# Supplementary material
Source: Research Square preprint supplement (doi:10.21203/rs.3.rs-8722751/v1)
Supplement: Supplementary file 1 [file e70f25f8b35d9e2a38e52b08.docx]

**Supplementary**

**FoMO, Social Comparison, and Depression by Demographic Variables**

This section summarizes group differences based on age, educational attainment, marital status, occupation, income, place of residence, Instagram usage duration, and purpose of use (Tables 8–15).

**Table 8. FoMO, Social Comparison, and Depression Scores by Age Groups**

| Variable | Age | N | X | SD | F | p | Post-hoc |
| --- | --- | --- | --- | --- | --- | --- | --- |
| Total FoMO | 18-29 | 350 | 18,66 | 11,28 | 5,248 | ,001 | 1> 3  1>4 |
| 30-39 | 37 | 14,21 | 7,31 |
| 40-49 | 30 | 13,26 | 5,36 |
| 50+ | 32 | 14,31 | 7,20 |
| Upward Social Comparison | 18-29 | 350 | 6,87 | 2,84 | 3,163 | ,024 | 1> 3 |
| 30-39 | 37 | 7,13 | 2,56 |
| 40-49 | 30 | 5,40 | 2,50 |
| 50+ | 32 | 6,25 | 2,52 |
| Downward Social Comparison | 18-29 | 350 | 6,77 | 2,67 | 1,397 | ,243 |  |
| 30-39 | 37 | 7,32 | 3,35 |
| 40-49 | 30 | 5,97 | 2,71 |
| 50+ | 32 | 6,75 | 2,21 |
| Total Depression | 18-29 | 350 | 15,31 | 9,85 | 5,251 | ,001 |
| 30-39 | 37 | 11,40 | 7,89 | 1>3 |
| 40-49 | 30 | 9,77 | 7,86 |
| 50+ | 32 | 12,31 | 7,65 |

The one-way ANOVA results indicate that FoMO and depression levels significantly differed across age groups (p = .001).Post-hoc analyses revealed that the 18–29 age group had significantly higher FoMO and depression scores compared to the 40–49 and 50+ age groups. Upward social comparison scores were also higher among young adults. No significant differences were found for downward social comparison.

**Table 9. Comparison of FoMO, Social Comparison, and Depression Levels by Educational Attainment**

| Variable | Educational Attainment | N | X | SD | F | p | Post-hoc |
| --- | --- | --- | --- | --- | --- | --- | --- |
| Total FoMO | High School | 31 | 15,74 | 7,85 | 1,298 | ,275 |  |
| Associate degree | 224 | 18,57 | 10,70 |
| Bachelor’s degree | 159 | 16,92 | 10,89 |
| Graduate degree | 35 | 16,43 | 10,89 |
| Upward Social Comparison | High School | 31 | 6,81 | 2,80 | 1,030 | ,379 |  |
| Associate degree | 224 | 6,93 | 2,79 |
| Bachelor’s degree | 159 | 6,44 | 2,79 |
| Graduate degree | 35 | 6,97 | 2,90 |
| Downward Social Comparison | High School | 31 | 6,61 | 2,63 | 1,027 | ,381 |  |
| Associate degree | 224 | 6,82 | 2,65 |
| Bachelor’s degree | 159 | 6,57 | 2,73 |
| Graduate degree | 35 | 7,43 | 3,06 |
| Beck Depression Inventory | High School | 31 | 15,45 | 9,26 | 3,574 | ,014 | 2>3  2>4 |
| Associate degree | 224 | 15,66 | 9,50 |
| Bachelor’s degree | 159 | 13,11 | 9,60 |
| Graduate degree | 35 | 11,40 | 9,28 |

FoMO and social comparison scores did not significantly differ by educational attainment (p > .05). However, depression scores showed a significant difference across educational levels (F(3, 445) = 3.574, p = .014). Depression scores were higher among participants with an associate degree compared to those with bachelor’s and graduate degrees. Overall, depression scores appeared to decrease as educational attainment increased.

**Table 10. Comparison of FoMO, Social Comparison, and Depression Levels by Marital Status**

| Variable | Marital status | N | X | SD | t | p |
| --- | --- | --- | --- | --- | --- | --- |
| Total FoMO | Married | 85 | 14,54 | 7,11 | -3,93 | ,000 |
| Single | 364 | 18,35 | 11,17 |
| Upward Social Comparison | Married | 85 | 6,18 | 2,64 | -2,20 | ,030 |
| Single | 364 | 6,88 | 2,82 |
| Downward Social Comparison | Married | 85 | 6,89 | 2,98 | 0,49 | ,623 |
| Single | 364 | 6,73 | 2,65 |
| Beck Depression Inventory | Married | 85 | 10,46 | 6,90 | -5,35 | ,000 |
| Single | 364 | 15,33 | 9,89 |

Independent samples t-test results indicated that single participants had significantly higher FoMO (M = 18.35), upward social comparison, and depression scores compared to married participants (p < .001). No significant difference was found between married and single participants in terms of downward social comparison.

**Table 11. Means, Standard Deviations, and ANOVA Results for FoMO, Upward Social Comparison, Downward Social Comparison, and Depression by Occupation Groups**

| Variable | Occupation | N | X | SS | F | p | Post Hoc |
| --- | --- | --- | --- | --- | --- | --- | --- |
| Total FoMO | Educator | 35 | 13,26 | 6,15 | 3,94 | .004 | 5 > 1  5 > 3 |
| Civil servant | 37 | 17,41 | 9,54 |
| Self-employed | 40 | 13,55 | 6,13 |
| Retired | 33 | 17,06 | 10,78 |
| Student | 304 | 18,75 | 11,36 |
| Upward Social Comparison | Educator | 35 | 6,80 | 2,51 | 1,30 | .269 |  |
| Civil servant | 37 | 6,81 | 3,01 |
| Self-employed | 40 | 6,28 | 2,70 |
| Retired | 33 | 5,88 | 2,29 |
| Student | 304 | 6,89 | 2,86 |
| Downward Social Comparison | Educator | 35 | 7,11 | 2,54 | 0,62 | .652 |  |
| Civil servant | 37 | 6,57 | 3,18 |
| Self-employed | 40 | 6,60 | 2,37 |
| Retired | 33 | 6,21 | 2,67 |
| Student | 304 | 6,83 | 2,72 |
| Beck Depression Inventory | Educator | 35 | 11,60 | 8,96 | 2,00 | .094 |  |
| Civil servant | 37 | 11,86 | 8,15 |
| Self-employed | 40 | 13,80 | 11,02 |
| Retired | 33 | 13,79 | 10,17 |
| Student | 304 | 15,19 | 9,49 |

FoMO scores significantly differed across occupation groups (F(4, 444) = 3.94, p < .01). Students had significantly higher FoMO scores compared to individuals in the educator and small business owner/businessperson groups. No statistically significant differences were found between occupation groups in terms of social comparison or depression scores; however, it is noteworthy that students also exhibited relatively higher depression scores.

**Table 12. Means, Standard Deviations, and ANOVA Results for FoMO, Upward Social Comparison, Downward Social Comparison, and Depression by Income Levels**

| Variable | Income | N | X | SD | F | p | Post-hoc |
| --- | --- | --- | --- | --- | --- | --- | --- |
| Total FoMO | 0–22.104 | 99 | 18,48 | 10,89 | 0,704 | .590 |  |
| 22.105–30.000 | 128 | 18,33 | 11,33 |
| 30.001–50.000 | 93 | 17,34 | 10,11 |
| 50.001–100.000 | 91 | 16,45 | 9,90 |
| 100.000+ | 38 | 16,50 | 10,48 |
| Upward Social Comparison | 0–22.104 | 99 | 7,09 | 2,99 | 0,839 | .501 |  |
| 22.105–30.000 | 128 | 6,78 | 2,75 |
| 30.001–50.000 | 93 | 6,69 | 2,68 |
| 50.001–100.000 | 91 | 6,63 | 2,72 |
| 100.000+ | 38 | 6,16 | 2,91 |
| Downward Social Comparison | 0–22.104 | 99 | 6,53 | 2,68 | 0,565 | .688 |  |
| 22.105–30.000 | 128 | 7,01 | 2,65 |
| 30.001–50.000 | 93 | 6,82 | 2,72 |
| 50.001–100.000 | 91 | 6,58 | 2,79 |
| 100.000+ | 38 | 6,78 | 2,78 |
| Beck Depression Inventory | 0–22.104 | 99 | 16,81 | 10,59 | 4,416 | .002 | 1>5  2>5  3>5  4>5 |
| 22.105–30.000 | 128 | 14,65 | 8,56 |
| 30.001–50.000 | 93 | 14,68 | 8,74 |
| 50.001–100.000 | 91 | 13,09 | 10,14 |
| 100.000+ | 38 | 9,73 | 9,00 |

FoMO and social comparison scores did not significantly differ across income levels (p > .05). However, depression scores showed a significant difference (F(4, 444) = 4.416, p = .002). Participants in the income group of 100,000 TL and above had significantly lower depression scores compared to all other income groups.

**Table 13. Comparison of Scale Scores by Place of Residence (ANOVA Results)**

| Variable | Place of Residence | X | SD | F | p | Post-Hoc |
| --- | --- | --- | --- | --- | --- | --- |
| Total FoMOS | Village District Province Metropolitan city | 17,62 17,57 18,84 16,49 | 9,80  10,84  11,56  9,75 | 0,99 | 0,397 |  |
| Upward Social Comparison | Village District Province Metropolitan city | 7,01 6,46 7,34 6,38 | 2,86  2,64  2,93  2,74 | 3,23 | 0,022 | 3 > 4 |
| Downward Social Comparison | Village District Province Metropolitan city | 6,98 6,37 7,21 6,68 | 2,66  2,53  2,90  2,70 | 2,27 | 0,080 |  |
| Total Beck Depression | Village District Province Metropolitan city | 16,52 13,93 13,99 14,31 | 8,01  9,46  9,90  10,09 | 1,19 | 0,314 |  |

No significant differences were found in FoMO or depression scores across place of residence. However, in the upward social comparison dimension, the mean score of the province/non-metropolitan group was significantly higher than that of the metropolitan group (p = .022).

**Table 14. Descriptive Statistics, ANOVA, and Post-hoc Results for FoMO, Social Comparison, and Depression Scores by Instagram Usage Duration**

| Variable | Usage Duration | N | X | SD | F | p | Post-hoc |
| --- | --- | --- | --- | --- | --- | --- | --- |
| FoMO | <1 hour | 66 | 14.09 | 7.61 | 12.25 | .001 | 1<3  1<4  1<5  2<3  2<4 |
| 1–2 hours | 171 | 15.09 | 7.89 |
| 3–5 hours | 157 | 19.52 | 11.59 |
| 6–8 hours | 39 | 23.67 | 14.08 |
| >8 hours | 16 | 26.00 | 13.39 |
| Upward Social Comparison | <1 hours | 66 | 5.91 | 2.74 | 5.24 | .001 | 1<4  2<4 |
| 1–2 hours | 171 | 6.50 | 2.66 |
| 3–5 hours | 157 | 6.92 | 2.82 |
| 6–8 hours | 39 | 8.08 | 2.76 |
| >8 hours | 16 | 8.06 | 3.00 |
| Downward Social Comparison | <1 hours | 66 | 5.83 | 2.75 | 2.96 | .020 | 1<2  1<3  1<4 |
| 1–2 hours | 171 | 6.81 | 2.68 |
| 3–5 hours | 157 | 6.90 | 2.69 |
| 6–8 hours | 39 | 7.56 | 2.64 |
| >8 hours | 16 | 6.75 | 2.59 |
| Beck Depression Inventory | <1 hours | 66 | 11.67 | 9.82 | 8.64 | .001 | 5>1  5>2  5>3  5>4  4>1 |
| 1–2 hours | 171 | 14.68 | 9.09 |
| 3–5 hours | 157 | 13.49 | 8.68 |
| 6–8 hours | 39 | 16.82 | 9.07 |
| >8 hours | 16 | 25.88 | 14.21 |

Significant differences were found in FoMO, upward/downward social comparison, and depression scores across Instagram usage duration groups (p < .05). In particular, FoMO scores increased significantly as usage duration increased.Participants who used Instagram for 6–8 hours or more per day had higher upward social comparison scores compared to those who used it for less than 1 hour. The highest mean depression scores were observed in the group that used Instagram for more than 8 hours per day; this group had significantly higher scores than all other usage groups.

**Table 15. Means, Standard Deviations, and ANOVA Results for FoMO, Upward Social Comparison, Downward Social Comparison, and Depression Scores by Social Media Usage Purposes**

| Variable | ****Purpose**** | N | X | SD | F | p | Post Hoc |
| --- | --- | --- | --- | --- | --- | --- | --- |
| Total FoMOS | Information seeking | 35 | 13.46 | 5.41 | 2.73 | .029 | 5 >1 |
| Following current events | 116 | 18.96 | 11.17 |
| Boredom relief | 172 | 17.66 | 10.49 |
| Consuming video/music content | 90 | 16.39 | 9.35 |
| Posting content | 36 | 20.33 | 14.56 |
| Upward Social Comparison | Information seeking | 35 | 6.23 | 2.83 | 4.03 | .003 | 5>1  5>2  5>3  5>4 |
| Following current events | 116 | 6.52 | 2.58 |
| Boredom relief | 172 | 6.77 | 2.66 |
| Consuming video/music content | 90 | 6.54 | 2.62 |
| Posting content | 36 | 8.44 | 3.91 |
| Downward Social Comparison | Information seeking | 35 | 6.74 | 2.81 | 0.67 | .615 |  |
| Following current events | 116 | 7.01 | 2.63 |
| Boredom relief | 172 | 6.56 | 2.52 |
| Consuming video/music content | 90 | 6.70 | 2.74 |
| Posting content | 36 | 7.14 | 3.61 |
| Beck Depression Inventory | Information seeking | 35 | 11.46 | 7.13 | 2.31 | .057 |  |
| Following current events | 116 | 14.72 | 9.90 |
| Boredom relief | 172 | 15.25 | 10.08 |
| Consuming video/music content | 90 | 12.73 | 8.19 |
| Posting content | 36 | 16.44 | 10.65 |

Significant differences were identified in FoMO and upward social comparison scores across social media usage purposes. Participants who used Instagram for posting had higher FoMO and upward social comparison scores compared to those who used it for information-seeking purposes.In contrast, differences between groups in downward social comparison and depression scores were limited and statistically weak. Overall, the findings indicate that young adults (18–29), single individuals, students, those who use Instagram for longer periods, and those who use it primarily for posting constitute more vulnerable groups in terms of FoMO and depression.
